# Supplementary material for: Temperature and Interspecific Competition Alter the Impacts of Two Invasive Species on a Key Ecosystem Process
Source: Research Square preprint supplement (doi:10.21203/rs.3.rs-1216379/v1), 2022-02-15
Supplement: Supplementary file 1 [file 991e793b615f52a6273fa3a3.docx]

**Temperature and interspecific competition alter the impacts of two invasive species on a key ecosystem process**

Francisco Carvalho1,2, Ronaldo Sousa1,2, Fernanda Cássio1,2, Cláudia Pascoal1,2

1 CBMA- Center of Molecular and Environmental Biology, Biology Department, University of Minho, Portugal

2  IB-S- Institute of Science and Innovation for Bio-Sustainability, University of Minho, Braga, Portugal.

CORRESPONDING AUTHOR:

Francisco Carvalho

E-mail: [fcarvalho@bio.uminho.pt](mailto:fcarvalho@bio.uminho.pt); [franciscocarvalhobio@gmail.com](mailto:franciscocarvalhobio@gmail.com)

FC: ORCID iD: <https://orcid.org/0000-0002-8414-9587>

RS: ORCID iD: <https://orcid.org/0000-0002-5961-5515>

FC: ORCID <https://orcid.org/0000-0003-3924-3280>

CP: ORCID <https://orcid.org/0000-0002-2018-4201>

**Table S1.**  Summary results of the Two-way ANOVAs on the effects of crayfish treatments and temperature on microbial, *Sericostoma* sp. and crayfish leaf-breakdown and FPOM production by crayfish.

|  |  | **Df** | **Sum Sq** | **Mean Sq** | **F value** | **Pr(>F)** |
| --- | --- | --- | --- | --- | --- | --- |
| Microbial | treatment | 3 | 0.073 | 0.024 | 0.474 | 0.70 |
| temp | 1 | 0.329 | 0.329 | 6.403 | 0.02 |
| treatment:temp | 3 | 0.099 | 0.033 | 0.642 | 0.60 |
| Residuals | 24 | 1.234 | 0.051 |  |  |
| *Sericostoma* Sp. | treatment | 3 | 0.269 | 0.090 | 1.300 | 0.30 |
| temp | 1 | 0.378 | 0.378 | 5.469 | 0.03 |
| treatment:temp | 3 | 0.090 | 0.030 | 0.433 | 0.73 |
| Residuals | 24 | 1.657 | 0.069 |  |  |
| Crayfish leaf breakdown | treatment | 2 | 0.001 | 0.001 | 3.784 | 0.04 |
| temp | 1 | 0.001 | 0.001 | 6.314 | 0.02 |
| treatment:temp | 2 | 0.000 | 0.000 | 1.363 | 0.28 |
| Residuals | 18 | 0.003 | 0.000 |  |  |
| Crayfish FPOM | treatment | 2 | 0.000 | 0.000 | 8.153 | 0.00 |
| temp | 1 | 0.000 | 0.000 | 14.939 | 0.00 |
| treatment:temp | 2 | 0.000 | 0.000 | 1.202 | 0.32 |
| Residuals | 18 | 0.000 | 0.000 |  |  |
